# Supplementary material for: Caught in the Web: A Review of Web-Based Suicide Prevention
Source: J Med Internet Res. 2014 Jan 28;16(1):e30. doi: 10.2196/jmir.2973 (PMC3936329; doi:10.2196/jmir.2973)
Supplement: Supplementary file 1 [file jmir_v16i1e30_app1.pdf]

**Multimedia Appendix 1.** Web-based suicide prevention strategies—Summary of the included articles.

| Sources                                           | Design | Organization | Aims and methods                                                                                                                                     | Findings                                                                                                                                                                                                                                                                                                                                                                                                                     | Quality |
|---------------------------------------------------|--------|--------------|------------------------------------------------------------------------------------------------------------------------------------------------------|------------------------------------------------------------------------------------------------------------------------------------------------------------------------------------------------------------------------------------------------------------------------------------------------------------------------------------------------------------------------------------------------------------------------------|---------|
| <b>Reviews</b>                                    |        |              |                                                                                                                                                      |                                                                                                                                                                                                                                                                                                                                                                                                                              |         |
| Krysinska and Leo (2007) [32]                     | Review | N/A          | Overview of telecommunication-based strategies (Internet and telephone)                                                                              | No clear evidence confirming efficacy of telecommunication-based strategies<br><br>Approaches seemed promising in increasing accessibility to services for suicidal individuals and raising public awareness                                                                                                                                                                                                                 | N/A     |
| Miller (2009) [33]                                | Review | N/A          | Discussion of potential role of Internet in suicide prevention through information provision, counseling, and chat rooms                             | Potential risk of Internet providing easy access to unregulated information<br>Internet counseling not recommended for those at high or immediate risk of suicide without availability of close and intensive monitoring<br>Despite a sense of community in chat rooms, limited avenue to learn new ways to cope<br>Professionally facilitated groups more effective in suicide prevention                                   | N/A     |
| <b>Randomized-controlled trials</b>               |        |              |                                                                                                                                                      |                                                                                                                                                                                                                                                                                                                                                                                                                              |         |
| Spijker (2012) [34];<br>Spijker et al (2012) [36] | RCT    | N/A          | Test effectiveness of unguided iCBT-based self-help to reduce suicidal thoughts and evaluate cost-effectiveness in general population sample (N=236) | For each intervention responder, annual cost savings was €34,727 (US \$41,325) compared to controls, and absenteeism improved at work<br><br>Intervention group (N=116) showed two-fold reduction in suicidal ideation with small effect sizes (d=0.28) at 6 weeks posttest compared to controls; effects maintained at 3-month follow-up<br><br>Limitations: self-report measures, outcome measures based on short duration | High    |

|                                         |                                                                                                  |                                                                                                |                                                                                                                                                                                           |                                                                                                                                                                                                                                                                                                                                                                                                                                                                                                                |        |
|-----------------------------------------|--------------------------------------------------------------------------------------------------|------------------------------------------------------------------------------------------------|-------------------------------------------------------------------------------------------------------------------------------------------------------------------------------------------|----------------------------------------------------------------------------------------------------------------------------------------------------------------------------------------------------------------------------------------------------------------------------------------------------------------------------------------------------------------------------------------------------------------------------------------------------------------------------------------------------------------|--------|
| Christensen et al (2013) [35]           | RCT                                                                                              | Lifeline Australian 24-hour telephone counseling service                                       | Evaluate the effectiveness of a 6-week iCBT intervention (MoodGym) on suicide ideation among telephone helpline callers (N=115)                                                           | <p>Data from secondary outcome (suicide ideation) of RCT on iCBT for depression</p> <p>Suicide ideation significantly reduced in all 4 intervention arms (1) iCBT alone, (2) iCBT &amp; telephone call back, (3) telephone call back alone, (4) treatment as usual control</p> <p>iCBT with or without telephone call back not superior to (3) or (4)</p> <p>Resolving depression significantly associated with improvement in suicide ideation</p> <p>Small effect sizes of iCBT (0.04-0.45) up to 1 year</p> | High   |
| <b>Descriptive/Naturalistic studies</b> |                                                                                                  |                                                                                                |                                                                                                                                                                                           |                                                                                                                                                                                                                                                                                                                                                                                                                                                                                                                |        |
| Watts et al (2012) [37]                 | Pre-treatment/posttreatment case series (effectiveness study within quality assurance framework) | Primary care                                                                                   | Examine suicidal ideation in depressed patients (n=299) who received 6 sessions of iCBT                                                                                                   | <p>Suicidal thought (measured by item 9 on the Patient Health Questionnaire) was common (54%) prior to intervention and reduced to 30% post-intervention; reduction was significant</p> <p>No control group</p>                                                                                                                                                                                                                                                                                                | Medium |
| Haas et al (2008) [38]                  | Cohort                                                                                           | American Foundation for Suicide Prevention (AFSP)                                              | College Screening Project for suicidal students via an interactive Web-based method                                                                                                       | <p>1162 (8% of invited participants) completed screening and 981 (84.4%) were identified as at risk</p> <p>Majority subsequently evaluated (190) and entered treatment (132) did so because of outreach</p> <p>Anecdotal report of lower incidence of suicide in a university setting after Web-based screening</p>                                                                                                                                                                                            | Medium |
| Moutier et al (2012) [39]               | Cohort                                                                                           | University of California, San Diego (UCSD) Suicide Prevention and Depression Awareness Program | <p>1. Web-based, anonymous confidential screening, assessment, and referral program (AFSP)</p> <p>2. Face-to-face education to medical students, and physicians on depression/suicide</p> | <p>374 individuals (13% of those receiving email invitation) completed screens, 27% at high risk for depression or suicide and 13% referred for care</p> <p>12/17 respondents who had first session with counselor credited the online screening program for getting help</p>                                                                                                                                                                                                                                  | Medium |

|                                  |                 |                                                                      |                                                                                                                                                  |                                                                                                                                                                                                                                                                                                                                                                                                                                                                                                                              |        |
|----------------------------------|-----------------|----------------------------------------------------------------------|--------------------------------------------------------------------------------------------------------------------------------------------------|------------------------------------------------------------------------------------------------------------------------------------------------------------------------------------------------------------------------------------------------------------------------------------------------------------------------------------------------------------------------------------------------------------------------------------------------------------------------------------------------------------------------------|--------|
| Feigelman et al (2008) [40]      | Cross-sectional | Suicide survivor support group                                       | Compare the demographic and loss-related characteristics of parents in Internet (N=104) and face-to-face suicide survivor support groups (N=297) | 35% in Internet group compared to 23% from face-to-face group reported suicidal ideation sometimes or more often during the last year<br>10% more Internet affiliates (17% compared to 7%) reported having a suicide plan<br>64% of respondents from Internet group indicated that helping advance goals of suicide prevention and better mental health resources availability as important features of their support group<br>14 anecdotal positive comments in Internet survey in combating depression and suicidal wishes | Medium |
| Szumilas and Kutcher (2009) [41] | Cross-sectional | N/A                                                                  | Evaluate the evidence on youth suicide risk factors and prevention strategies from top 20 information websites                                   | Only 44.2% statements were supported by evidence<br>Crediting and recommendation to health consultation increased odds of statements being supported by evidence                                                                                                                                                                                                                                                                                                                                                             | High   |
| Barak (2007) [23]                | Descriptive     | SAHAR (Support and Listening on the Net)                             | 1. Hebrew website<br>2. Personal communication: Chat/email<br>3. Group communication: Online forum/chat                                          | Around 1000 personal contacts per month and half of them are suicidal<br>More than 100 rescue operations of attempters<br>Support/referral<br>Appreciation/positive feedback from users                                                                                                                                                                                                                                                                                                                                      | Medium |
| Lester (2008) [43]               | Descriptive     | 1. Befrienders (Samaritans)<br>2. SAHAR (Primary source Barak, 2007) | Counseling via Internet                                                                                                                          | Received 15,309 emails in 1998 to 64,000 in 2001; 50% suicidal in nature. Described feasibility and benefits of email counseling with reply within 24 hours                                                                                                                                                                                                                                                                                                                                                                  | Low    |
| Gilat and Shahr (2009) [44]      | Descriptive     | Israeli Assoc'n for Emotional First Aid (ERAN)                       | 1. Online support group via moderators<br>2. Personal chat<br>3. Email                                                                           | Help-promoting environment for suicidal individuals may be generated; single positive comment from a user                                                                                                                                                                                                                                                                                                                                                                                                                    | Low    |
| Manning and VanDeusen            | Descriptive     | Western Michigan University's                                        | 1. Online training course<br>2. Website                                                                                                          | Over 7000 hits on website<br>Networks identified 1550 "friends"                                                                                                                                                                                                                                                                                                                                                                                                                                                              | Low    |

|                                   |                                         |                                     |                                                                                              |                                                                                                                                                                                   |      |
|-----------------------------------|-----------------------------------------|-------------------------------------|----------------------------------------------------------------------------------------------|-----------------------------------------------------------------------------------------------------------------------------------------------------------------------------------|------|
| (2011) [45]                       |                                         | Suicide Prevention Program (SPP)    | 3. Two social networking website profiles                                                    | Positive feedback from students but low participation on online training course<br>Increased frequency of presentation with suicidal ideation for counseling since implementation |      |
| Greidanus and Everall (2010) [42] | Qualitative research (content analysis) | Community suicide prevention agency | Analyze 'suicide'-themed online message board to explore experiences of help-seeking process | A positive online mutual-help group monitored by trained volunteers for those users was developed<br>Help-seekers who benefited provided peer support to others                   | High |
